# Supplementary material for: Functionalized Schiff-base containing phenothiazine and cholic acid as a paper-based fluorescence turn-off sensor for Sn(ii) ion detection and its application
Source: Royal Society of Chemistry journal article supplement (doi:10.1039/d4nj00853g), 2024-01-01
Supplement: d4nj00853g1.pdf [file d4nj00853g1.pdf]

## Electronic supplementary information

# **Functionalized Schiff-base Containing Phenothiazine and Cholic Acid as a Paper-based Fluorescence Turn-off Sensor for Sn(II) Ion-detection and Its Application**

Dipakkumar Bariya, Satyendra Mishra\*

Department of Biotechnology and Bioengineering, Institute of Advanced Research, Gujarat,  
382426, India

\*Author for Correspondence: [satyendramishra1@gmail.com](mailto:satyendramishra1@gmail.com); [satyendra.mishra@iar.ac.in](mailto:satyendra.mishra@iar.ac.in)

## Content:

### Experimental Section

**Fig. S1:** FT-IR Spectrum of ChHSB-PTZ

**Fig. S2:**  $^1\text{H}$  NMR Spectrum of ChHSB-PTZ in  $\text{CDCl}_3$

**Fig. S3:**  $^{13}\text{C}$  NMR Spectrum of ChHSB-PTZ in  $\text{DMSO}-d_6$

**Fig. S4:** ESI-Mass Spectrum of ChHSB-PTZ

**Fig. S5:** PL spectra (right) and Absorption spectra (left) of the ICT studies for ChHSB-PTZ ( $1 \times 10^{-6} \text{ M}$ ) performed for four different solvents

**Fig. S6:** Time-dependent absorption spectra (left) and fluorescence emission spectra (right) spectra of ChHSB-PTZ ( $1 \times 10^{-6} \text{ M}$ ) in THF. The spectra were obtained every 1 hour (0–10 hours).

**Fig. S7** Time-resolved photoluminescence spectrum for photostability of ChHSB-PTZ ( $1 \times 10^{-6} \text{ M}$ ) in THF. The remaining fluorescence emission intensities of ChHSB-PTZ as a function of irradiation time. Irradiated at 350 nm. Fluorescence intensity was measured at 484 nm.

**Fig. S8:** Fluorescence spectra of PTZ-CHO ( $1 \times 10^{-6} \text{ M}$ , THF) in THF in the presence of different metal ions ( $1 \times 10^{-5} \text{ M}$ ).

**Fig. S9:** (a) Relative fluorescence intensity changes of ChHSB-PTZ ( $1 \times 10^{-6} \text{ M}$ ) as a function of tin concentration (b) Stern-Volmer graph of ChHSB-PTZ ( $1 \times 10^{-6} \text{ M}$ ) upon addition of  $\text{Sn}^{2+}$  metal ion ( $1 \times 10^{-5} \text{ M}$ ).

**Fig. S10:** Modified Stern-Volmer plot for fluorescence quenching of ChHSB-PTZ ( $1 \times 10^{-6} \text{ M}$ ) by  $\text{Sn}^{2+}$  metal ion ( $1 \times 10^{-5} \text{ M}$ ).

**Fig. S11:** Job's plot for the realization of the stoichiometry of ChHSB-PTZ and Sn(II) metal ion.

**Fig. S12:** Contour plots for the HOMO, HOMO – 1, LUMO, and LUMO + 1 orbitals were generated for the ChHSB-PTZ.

**Fig. S13:**  $^1\text{H}$  NMR spectra of ChHSB-PTZ and ChHSB-PTZ (1 equivalent) in presence of Sn(II) metal ion (1 equivalent) in  $\text{DMSO}-d_6$  solvent (500 MHz).

**Fig. S14** Modified Stern-Volmer plot of paper sensor in presence of Sn(II) metal ions.

**Fig. S15** Stability of ChHSB-PTZ Paper Sensor after two months.

**Fig. S16:** (a) Fluorescence spectra of ChHSB-PTZ ( $1 \times 10^{-6} M$ ) in THF in the presence of different anions ( $1 \times 10^{-5} M$ ) (b) Fluorescent intensity of ChHSB-PTZ ( $1 \times 10^{-6} M$ ) towards different metal ions (c) Fluorescent intensity of ChHSB-PTZ ( $1 \times 10^{-6} M$ ) towards Sn(II) metal ion ( $1 \times 10^{-5} M$ ) in the presence of different interfering anions.

## Experimental Section

### General Information

All anhydrous reactions were carried out by standard procedures under nitrogen atmosphere to avoid moisture. The solvents were dried by distillation over appropriate drying agents. Reactions were monitored by TLC plates and column chromatography was generally performed on silica gel.  $^1H$  and  $^{13}C$  NMR were recorded on a 400 MHz spectrometer. Photophysical properties, including absorption and emission spectra, were recorded using a SHIMADZU (UV-1900i) spectrophotometer and Hitachi F-2700 spectrofluorometer, respectively. Chemicals, reagents and solvents used in this study were obtained from local vendors and employed in their received condition without any additional purification steps. Particularly, starting materials such as cholic acid, hydrazine, 1-bromohexane and phenothiazine were acquired from Sigma Aldrich. DMSO,  $POCl_3$ , THF, NaOH and other chemical reagents were obtained from SRL Chemicals. The metal ion recognition property of ChHSB-PTZ was explored by spectrofluorometer upon the addition of analytical grade metal salts  $Cu(OAc)_2$ ,  $CuCl_2$ ,  $Cu(ClO_4)_2$ ,  $CuSO_4 \cdot 5H_2O$ ,  $Cu(NO_3)_2 \cdot 3H_2O$ ,  $Ni(NO_3)_2 \cdot 6H_2O$ ,  $Pb(NO_3)_2$ ,  $Co(NO_3)_2 \cdot 6H_2O$ ,  $Hg(NO_3)_2 \cdot H_2O$ ,  $Fe(NO_3)_2 \cdot 9H_2O$ ,  $Zn(NO_3)_2 \cdot 6H_2O$ ,  $Fe(NO_3)_3 \cdot 9H_2O$ ,  $AgNO_3$ ,  $Ca(NO_3)_2 \cdot 4H_2O$ ,  $Mg(NO_3)_2 \cdot 6H_2O$ ,  $SnCl_2 \cdot 2H_2O$  for cation and sodium salt NaCl, NaF, NaSCN,  $Na_2Cr_2O_7 \cdot 2H_2O$ ,  $Na_2CrO_4$ ,  $Na_3PO_4$ ,  $Na_2HPO_4$ ,  $NaH_2PO_4$ , NaBr, NaI,  $NaNO_3$  used as anion from local vendors. Deionized water used in all spectroscopic investigations was obtained from a Milli-Q reference water purification system by Thermo-Scientific, which

ensures precise resistivity. A stock solution of ChHSB-PTZ ( $10^{-3}$  M) was prepared in THF. Similarly, stock solutions for cations and anions ( $10^{-4}$  M) were carefully prepared in deionized water, specifically for evaluation of optical properties.

### Synthesis of Phenothiazine Carbaldehyde (PTZ-CHO):

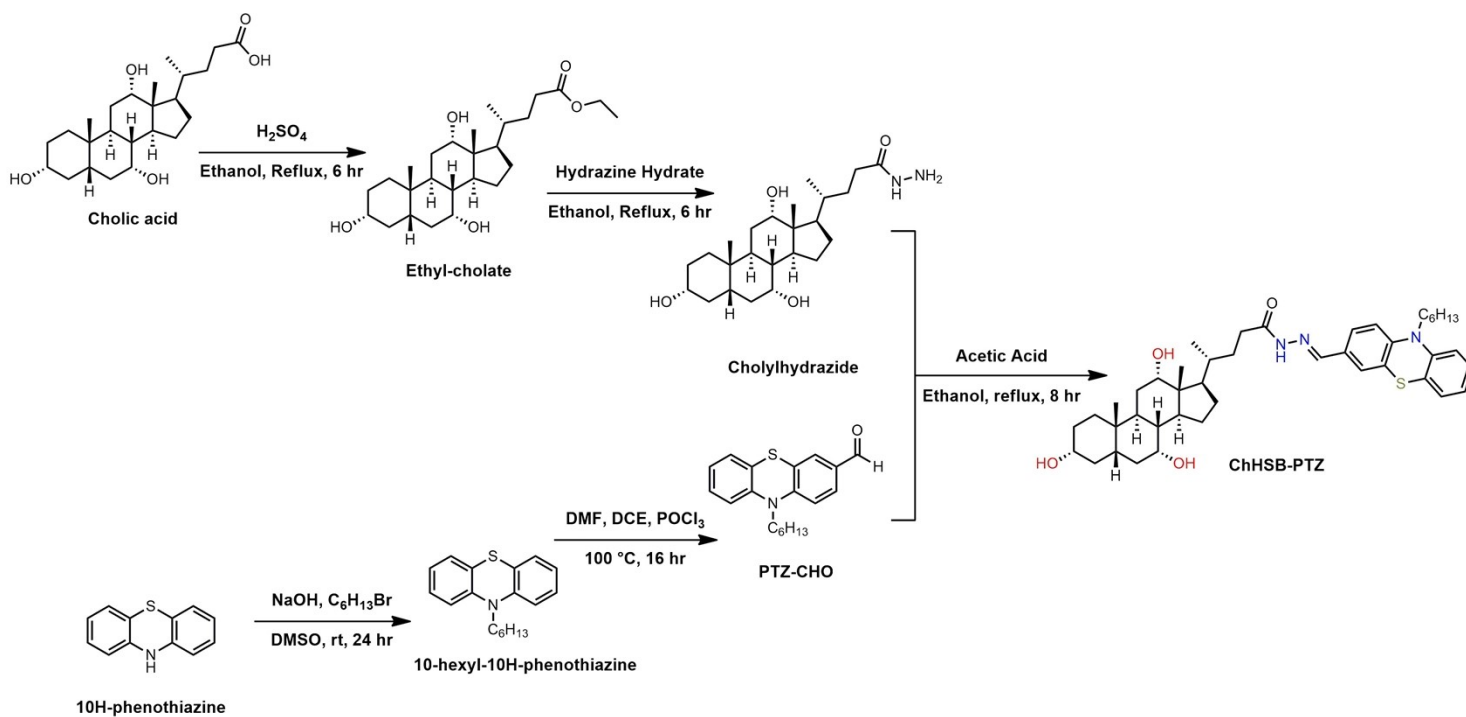

**Scheme S1:** Synthesis of ChHSB-PTZ

**1-2 Synthesis of PTZ-CHO:** To a combination of phenothiazine (2.5 g, 12.5 mmol) and  $\text{C}_6\text{H}_{13}\text{Br}$  (1.93 ml, 13.9 mmol) in 50 mL DMSO,  $\text{NaOH}$  (0.85 g, 21.32 mmol) was added under cooling condition. Then, the resultant blend was stirred at RT for 24 hours after which 200 mL of  $\text{H}_2\text{O}$  was mixed. The resultant mix was extracted using  $\text{CHCl}_3$  (3x50 mL) and water. Then, the organic layer was washed with a saturated brine solution and then dried using anhydrous  $\text{Na}_2\text{SO}_4$  to remove any

trace of moisture. After evaporating the solvent, the mixture was purified via column chromatography, in which n-hexane was used as the solvent on silica gel. Finally, white oily liquid (Compound 1, yield 86 %) was obtained. After obtaining a 10-hexyl-10H-phenothiazine which is the alkylated form of phenothiazine, PTZ-CHO was synthesized. For the synthesis of PTZ-CHO, POCl<sub>3</sub> (2.64 mL, 28.2 mmol) was added dropwise to an ice cooled RB flask comprising DMF (12 mL). The combination was stirred at 0 °C for 1 hour and then, compound 1 (1.78 gm, 6.2 mmol) was added to it. Finally, the reaction mix was exposed to a temperature of 80 °C for 16 h. After that, the crude product was poured into ice-water. Then, saturated aqueous K<sub>2</sub>CO<sub>3</sub> was added to the mixture and extracted with chloroform (4x30 mL). Eventually, moisture was removed using MgSO<sub>4</sub>. Finally, the solvent was removed using rotatory evaporator, and the crude product was purified using column chromatography [Hexane/EtOAc (8:2) as eluent]. Thus, a pale-yellow solid is obtained (yield 94%).

**The fluorescence quantum yields:** The fluorescence quantum yields for the ChHSB-PTZ were calculated using Fluorescein as the standard by using the steady-state comparative method:

$$\Phi_f = \Phi_{ST} * \frac{S_U}{S_{ST}} * \frac{A_{ST}}{A_U} * \frac{\eta_{Du}^2}{\eta_{ST}^2}$$

**Equation S1:** Quantum yield formula

Where,  $\Phi_f$  is the emission quantum yield of the sample,  $\Phi_{ST}$  is the emission quantum yield of the standard, and  $A_{ST}$  and  $A_U$  represent the absorbance of the standard and the sample at the excitation wavelength, respectively.  $S_{ST}$  and  $S_U$  are the integrated emission band areas of the standard and

the sample, respectively and  $\eta_{ST}$  and  $\eta_{Du}$  are the solvent refractive indices of the standard and the sample.

### Optical Band Gap:

$$E_g = \frac{1240}{\lambda_{onset}}$$

**Equation S2:** Optical Band Gap formula

### Spectroscopic analysis of synthesized compounds

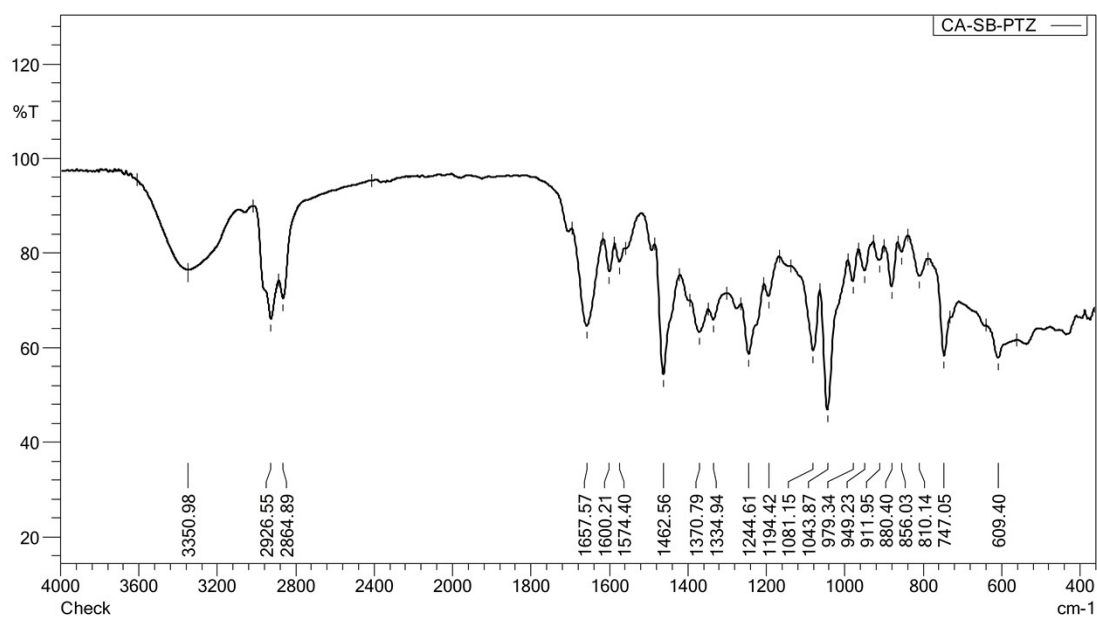

**Fig. S1:** FT-IR Spectrum of ChHSB-PTZ

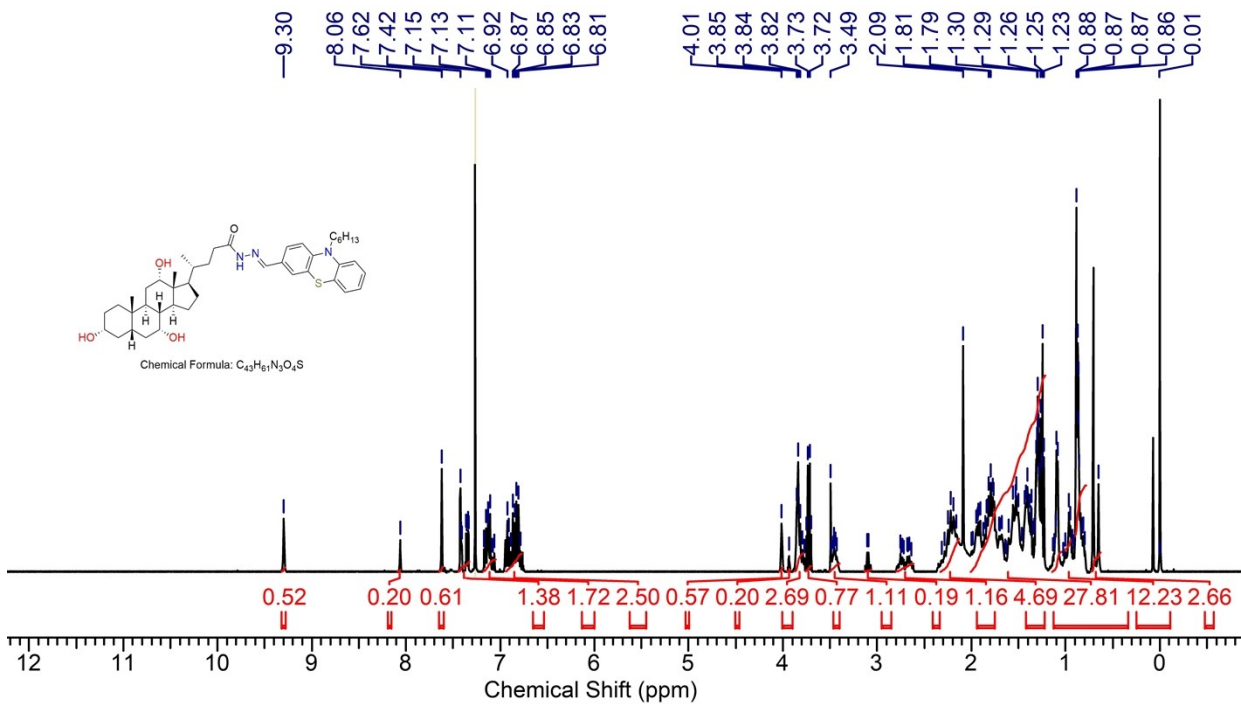

**Fig. S2:**  $^1H$  NMR Spectrum of ChHSB-PTZ in  $CDCl_3$

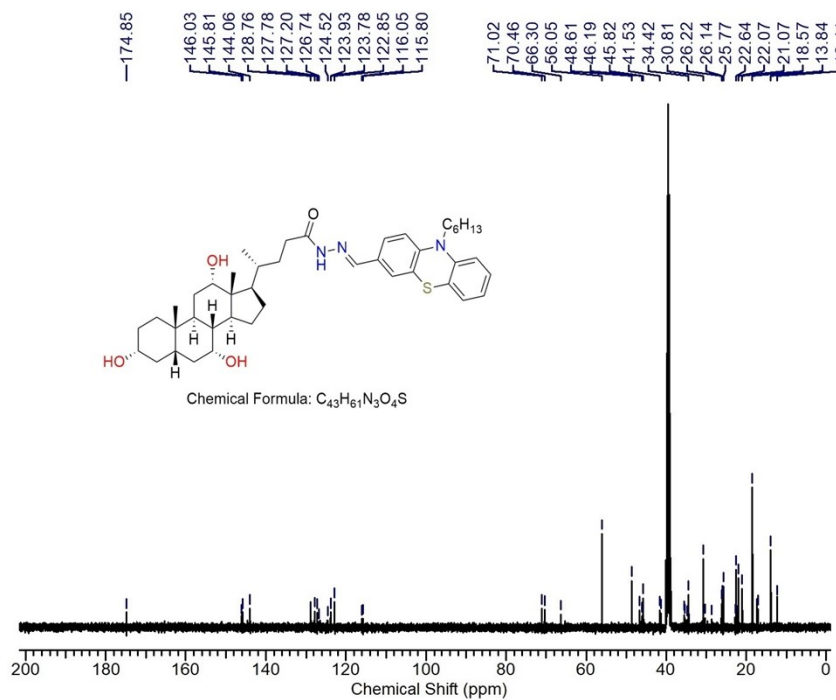

**Fig. S3:**  $^{13}C$  NMR Spectrum of ChHSB-PTZ in  $DMSO-d_6$

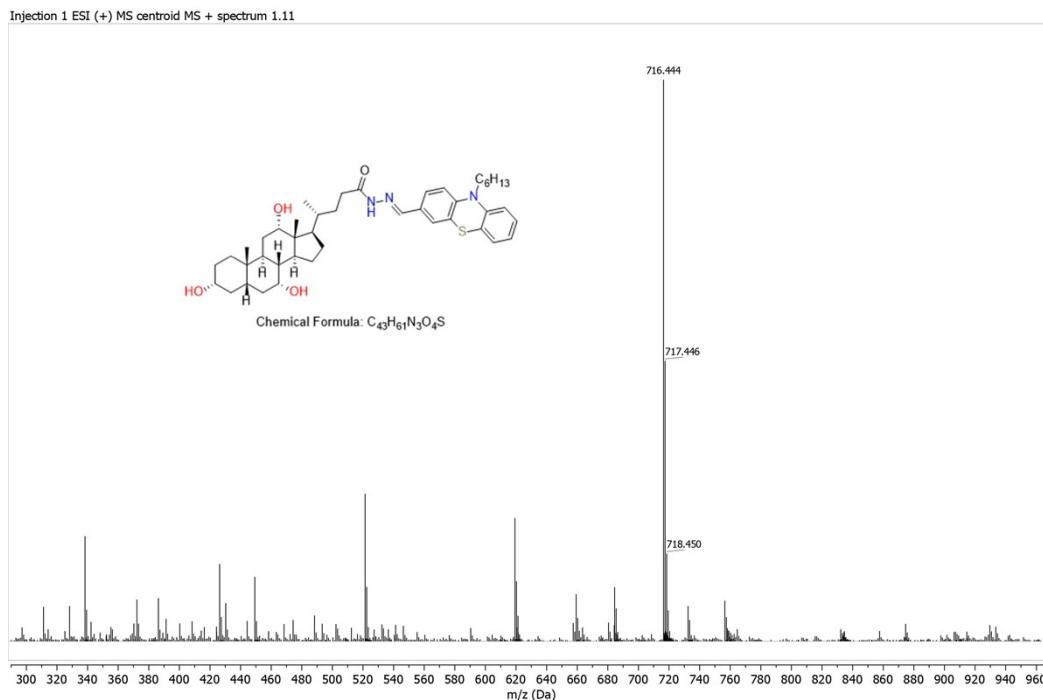

**Fig. S4:** ESI-Mass Spectrum of ChHSB-PTZ

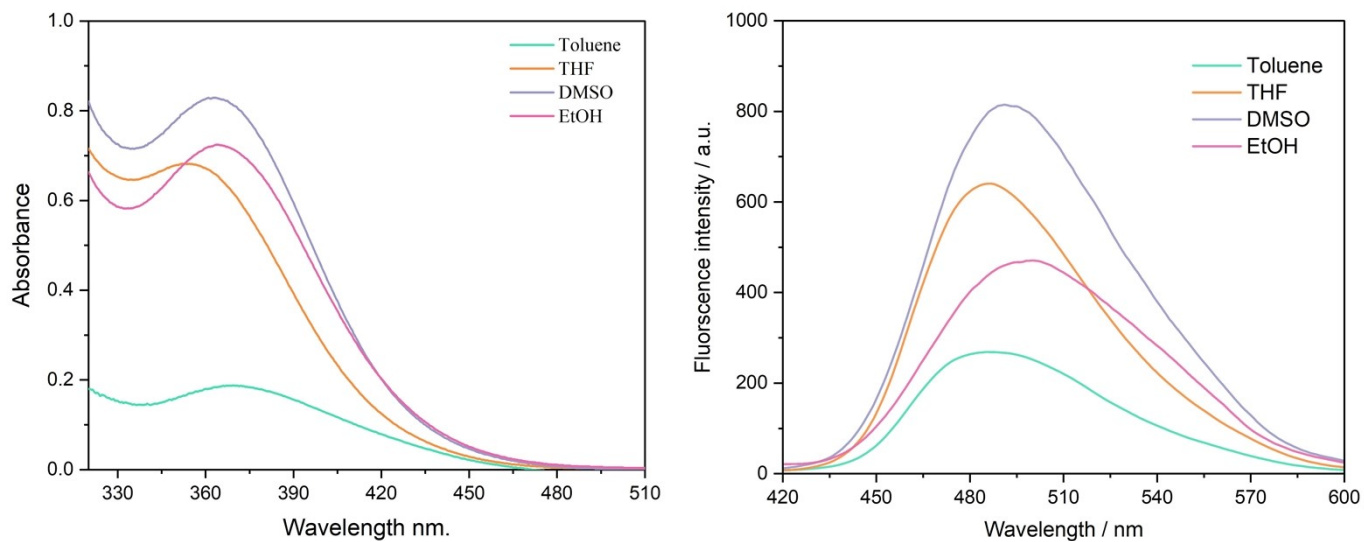

**Fig. S5:** Absorption spectra (left) and fluorescent spectra (right) of the ICT studies for ChHSB-PTZ ( $1 \times 10^{-6} M$ ) performed for four different solvents.



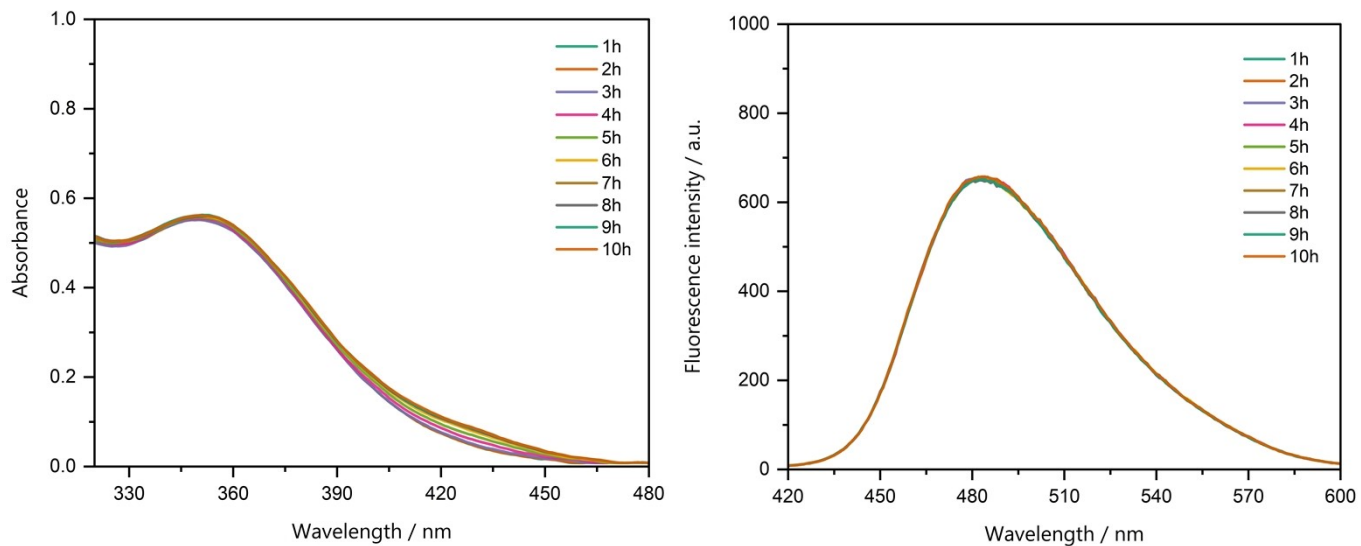

**Fig. S6:** Time-dependent absorption spectra (left) and fluorescence emission spectra (right) spectra of ChHSB-PTZ ( $1 \times 10^{-6} M$ ) in THF. The spectra were obtained every 1 hour (0–10 hours).

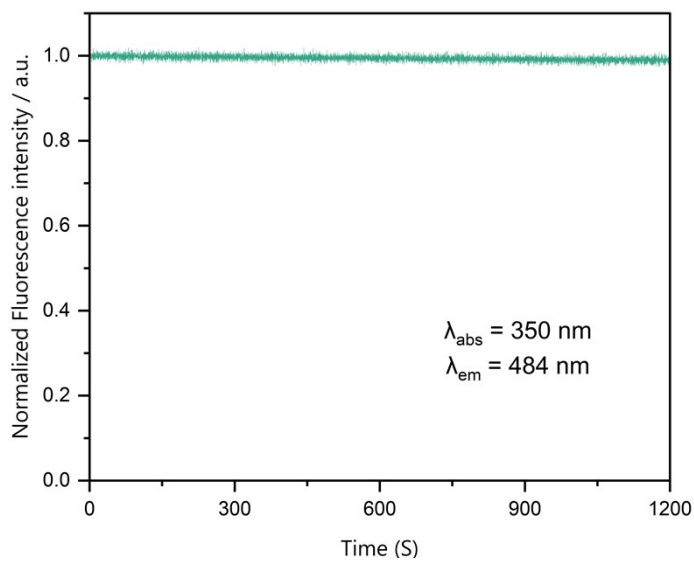

**Fig. S7** Time-resolved photoluminescence spectrum for photostability of ChHSB-PTZ ( $1 \times 10^{-6} M$ ) in THF. The remaining fluorescence emission intensities of ChHSB-PTZ as a function of irradiation time. Irradiated at 350 nm. Fluorescence intensity was measured at 484 nm.

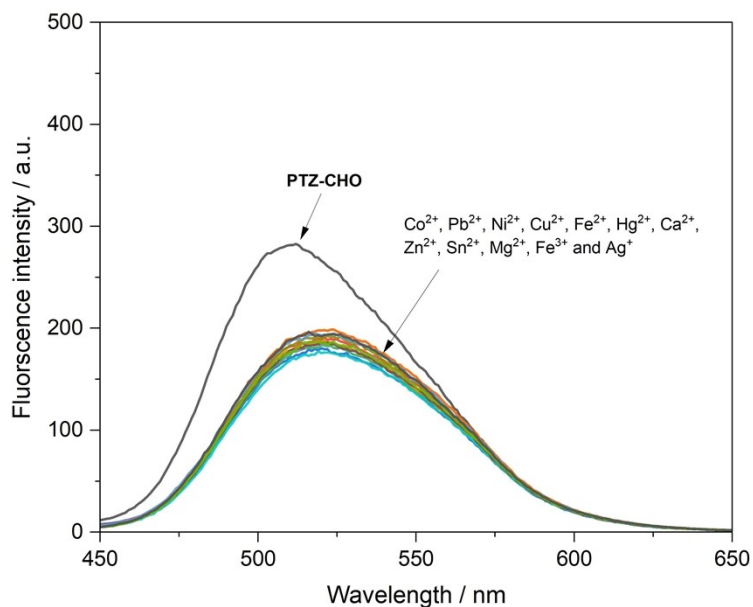

**Fig. S8:** Fluorescence spectra of PTZ-CHO ( $1 \times 10^{-6} M$ , THF) in THF in the presence of different metal ions ( $1 \times 10^{-5} M$ ).

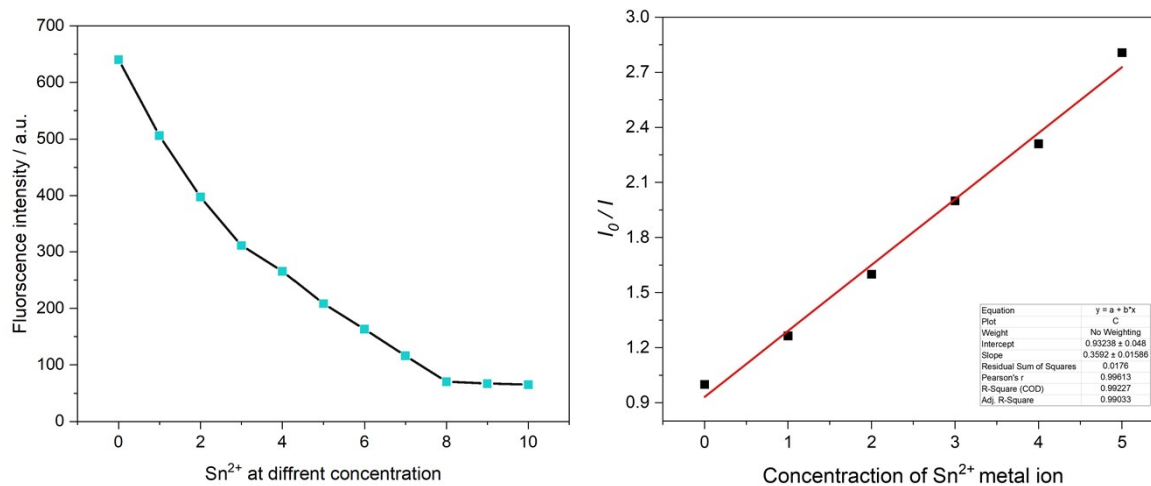

**Fig. S9:** (a) Relative fluorescence intensity changes of ChHSB-PTZ ( $1 \times 10^{-6} M$ ) as a function of tin ( $1 \times 10^{-5} M$ ) concentration (b) Stern-Volmer graph of ChHSB-PTZ ( $1 \times 10^{-6} M$ ) upon addition of Sn<sup>2+</sup> metal ion ( $1 \times 10^{-5} M$ ).

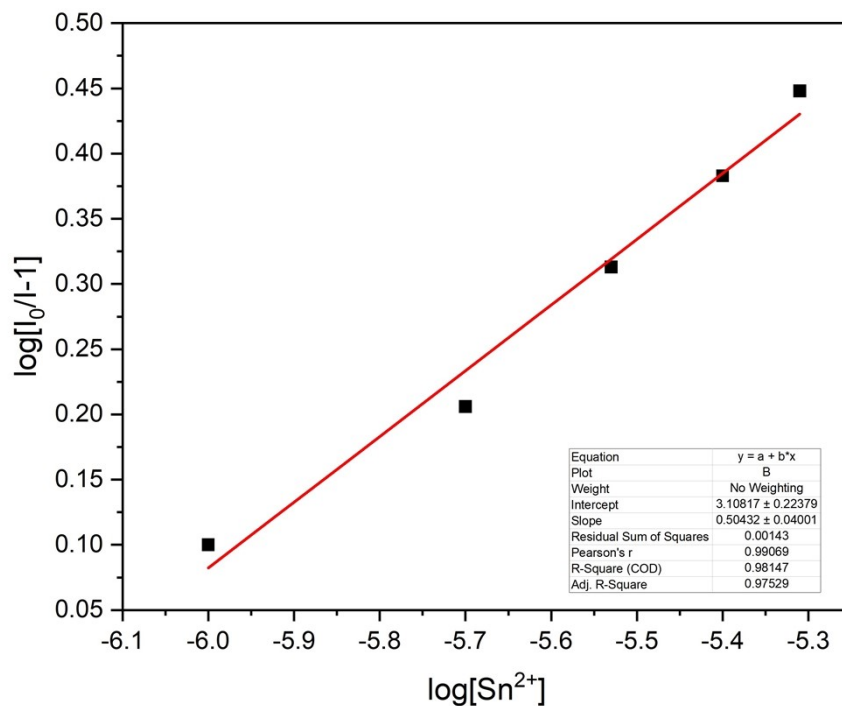

**Fig. S10:** Modified Stern-Volmer plot for fluorescence quenching of ChHSB-PTZ ( $1 \times 10^{-6} M$ ) by Sn(II) metal ion ( $1 \times 10^{-5} M$ ).

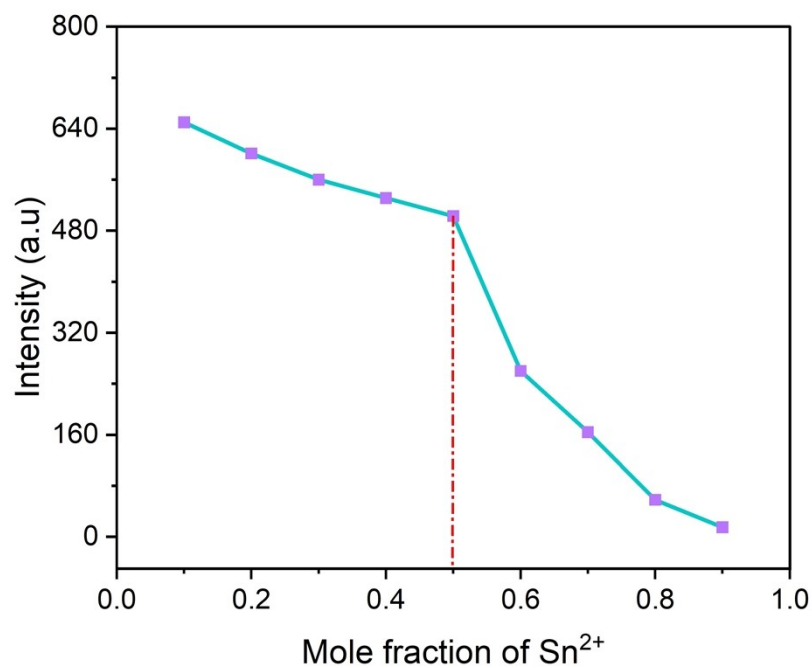

**Fig. S11:** Job's plot for the realization of the stoichiometry of ChHSB-PTZ and Sn(II) metal ion.

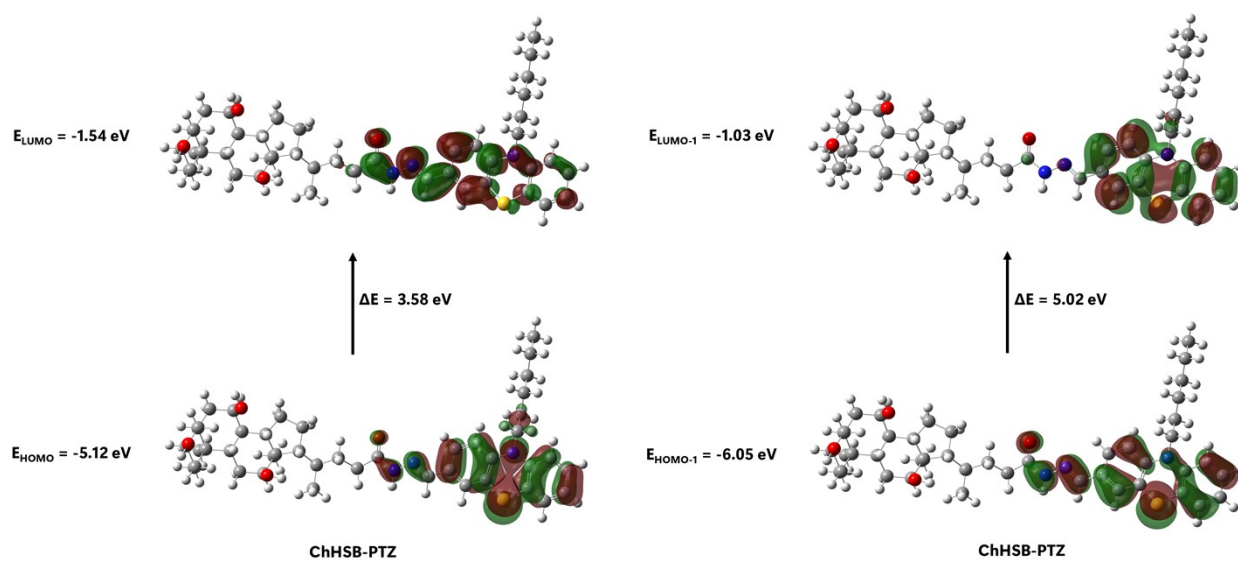

**Fig. S12:** Contour plots for the HOMO, HOMO – 1, LUMO, and LUMO + 1 orbitals were generated for the ChHSB-PTZ.

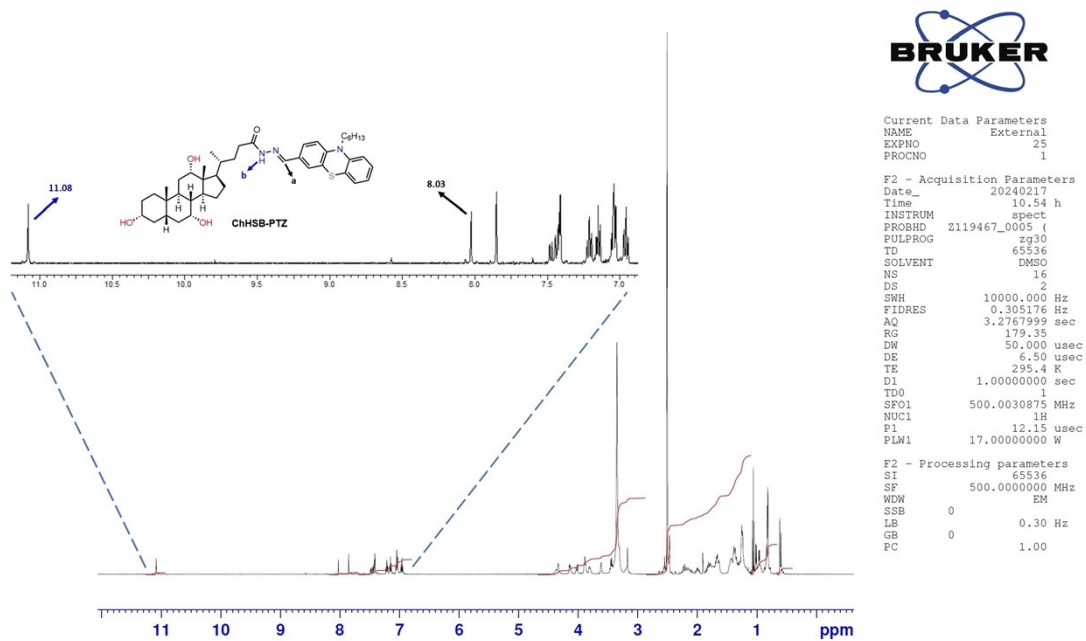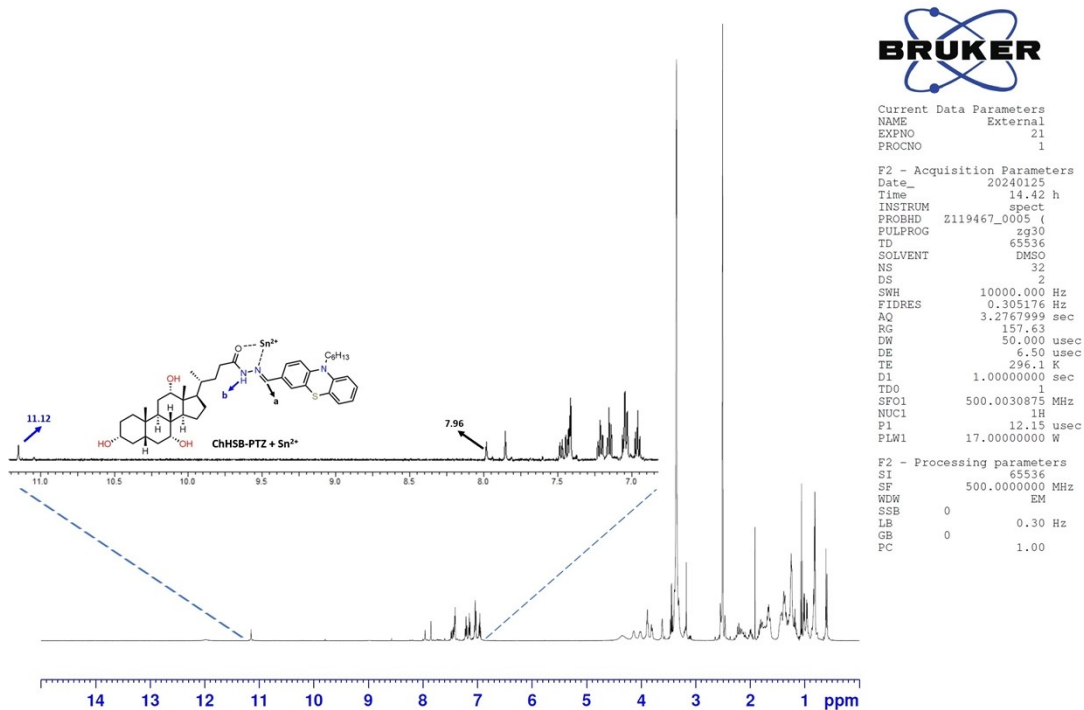

**Fig. S13:**  $^1\text{H}$  NMR spectra of ChHSB-PTZ and ChHSB-PTZ (1 equivalent) in presence of Sn(II) metal ion (1 equivalent) in  $\text{DMSO} - d_6$  solvent (500 MHz).

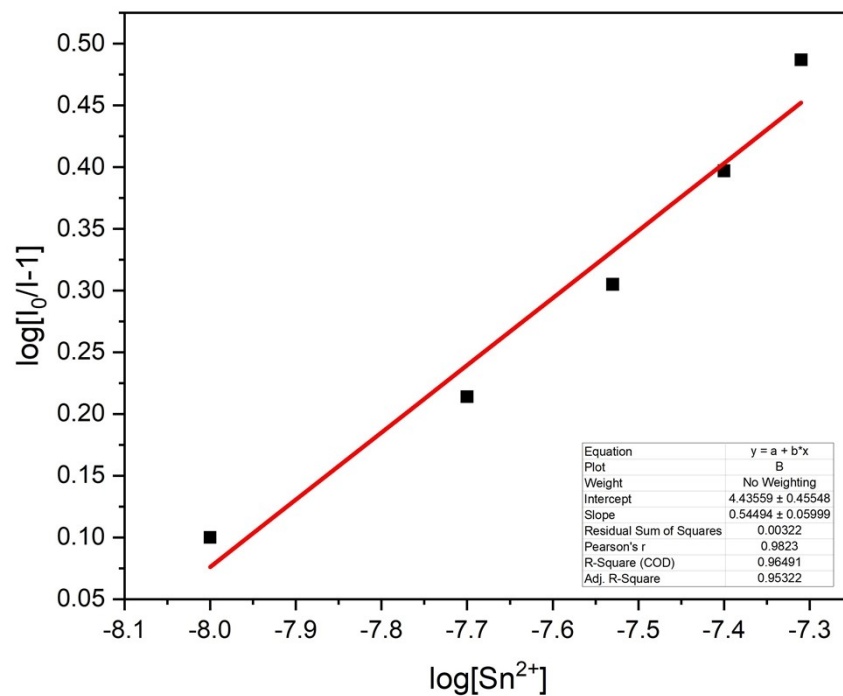

**Fig. S14:** Modified Stern-Volmer plot of paper sensor in presence of Sn(II) metal ions.

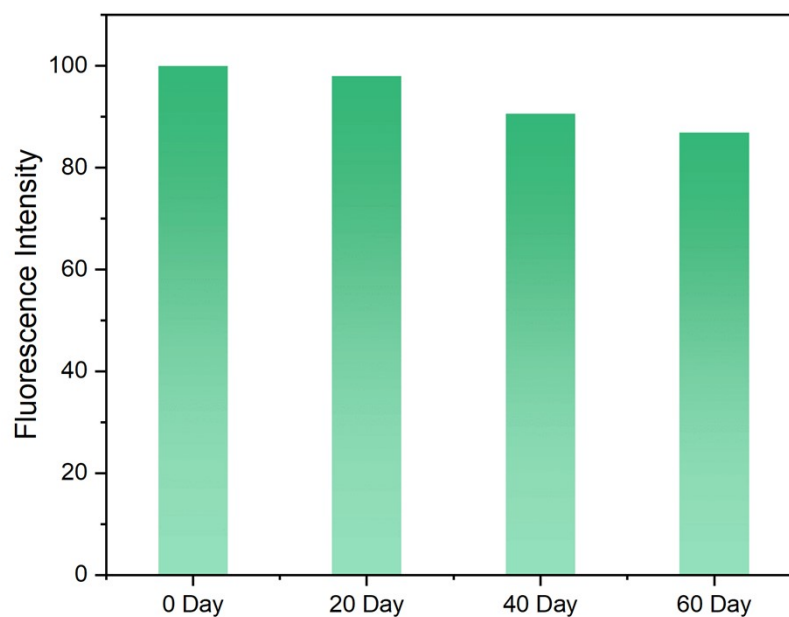

**Fig. S15:** Stability of ChHSB-PTZ Paper Sensor after two months.

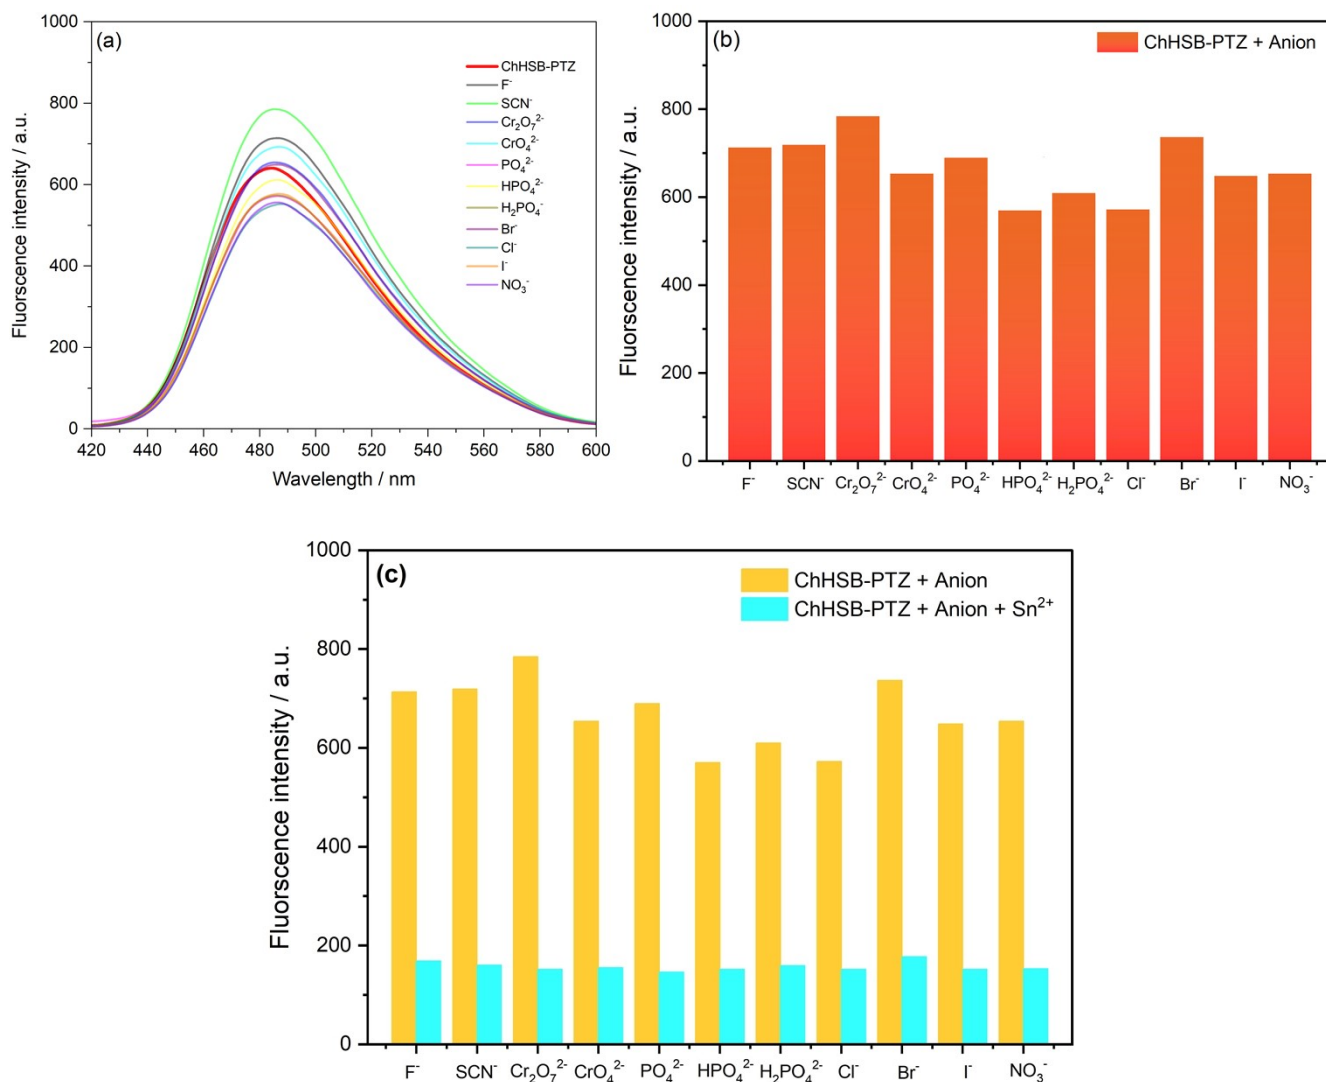

**Fig. S16:** (a) Fluorescence spectra of ChHSB-PTZ ( $1 \times 10^{-6} M$ ) in THF in the presence of different anions ( $1 \times 10^{-5} M$ ) (b) Fluorescent intensity of ChHSB-PTZ ( $1 \times 10^{-6} M$ ) towards different metal ions (c) Fluorescent intensity of ChHSB-PTZ ( $1 \times 10^{-6} M$ ) towards Sn(II) metal ion ( $1 \times 10^{-5} M$ ) in the presence of different interfering anions.

Reference:

1. Y. B. Barot, V. Anand and R. Mishra, *New J. Chem.*, 2022, **46**, 15666–15677.

2. Y. B. Barot, V. Anand and R. Mishra, *J. Photochem. Photobiol. A Chem.*, 2023, 434, 114224.
